# Supplementary material for: Changes in Mouse Gut Microbial Community in Response to the Different Types of Commonly Consumed Meat
Source: PubMed Central journal article supplement (PMC6462912; doi:10.3390/microorganisms7030076), 2019-03-11
Supplement: microorganisms-07-00076-s001.pdf [file microorganisms-07-00076-s001.pdf]

## Supplementary Material

# Changes in mouse gut microbial community in response to the different types of commonly consumed meat

Zhimin Zhang<sup>1,2</sup>, Dapeng Li<sup>1,3\*</sup> and Rong Tang<sup>1,3</sup>

<sup>1</sup>College of Fisheries, Huazhong Agricultural University, Wuhan, 430070, China

<sup>2</sup>Institute of Hydrobiology, Chinese Academy of Sciences, Wuhan 430072, China

<sup>3</sup>Hubei Provincial Engineering Laboratory for Pond Aquaculture, Wuhan, 430070, China

\*Correspondence: ldp@mail.hzau.edu.cn; Tel.: +86-27-15397118600 (D.L.)

## Supplementary Tables

**Table S1.** Sequence information of fecal samples used in this study.

| Sample ID | Raw PE | Combined | Qualified | Q20   | Q30   | GC%   | Effective% |
|-----------|--------|----------|-----------|-------|-------|-------|------------|
| Chow1     | 62,503 | 57,779   | 55,280    | 98.55 | 96.98 | 53.61 | 83.99      |
| Chow2     | 52,433 | 48,905   | 46,788    | 98.6  | 97.1  | 53.6  | 83.67      |
| Chow3     | 50,091 | 46,419   | 44,269    | 98.52 | 96.93 | 54.27 | 83.89      |
| Chow4     | 53,645 | 48,683   | 46,551    | 98.53 | 96.95 | 53.91 | 82.16      |
| Chow5     | 55,827 | 51,520   | 49,247    | 98.54 | 96.93 | 54.31 | 85.12      |
| Chow6     | 59,437 | 53,814   | 51,707    | 98.54 | 96.96 | 53.58 | 82.39      |
| Chow7     | 67,452 | 60,926   | 58,500    | 98.56 | 97    | 53.59 | 81.65      |
| Chow8     | 60,198 | 54,644   | 52,572    | 98.61 | 97.17 | 53.41 | 81.43      |
| Chow9     | 67,306 | 61,336   | 58,965    | 98.64 | 97.23 | 53.78 | 81.92      |
| Chow10    | 62,406 | 56,875   | 54,677    | 98.59 | 97.08 | 53.68 | 81.81      |
| Fish1     | 50,460 | 45,548   | 43,786    | 98.62 | 97.21 | 53.2  | 81.33      |
| Fish2     | 54,605 | 50,279   | 48,296    | 98.68 | 97.24 | 53.59 | 82.91      |
| Fish3     | 59,811 | 54,918   | 52,671    | 98.62 | 97.18 | 53.09 | 83.39      |
| Fish4     | 60,828 | 55,598   | 53,262    | 98.6  | 97.14 | 52.99 | 80.83      |
| Fish5     | 65,207 | 59,839   | 57,290    | 98.59 | 97.14 | 53.39 | 83.05      |
| Fish6     | 64,807 | 58,671   | 56,261    | 98.54 | 97.01 | 53.13 | 82.3       |
| Fish7     | 62,720 | 57,173   | 54,760    | 98.6  | 97.11 | 53.46 | 82.29      |
| Fish8     | 50,567 | 46,212   | 44,391    | 98.63 | 97.19 | 53.46 | 83.61      |
| Fish9     | 68,430 | 62,067   | 59,533    | 98.59 | 97.08 | 53.59 | 83.61      |
| Fish10    | 59,824 | 54,588   | 52,441    | 98.63 | 97.22 | 53.07 | 81.45      |
| Beef1     | 62,670 | 56,905   | 54,774    | 98.61 | 97.14 | 53.24 | 79.23      |
| Beef2     | 53,217 | 48,392   | 46,511    | 98.62 | 97.22 | 53.11 | 78.07      |
| Beef3     | 56,291 | 51,565   | 49,627    | 98.67 | 97.28 | 53.51 | 80.54      |
| Beef4     | 53,383 | 48,824   | 46,995    | 98.65 | 97.21 | 53.53 | 80.77      |
| Beef5     | 59,770 | 54,377   | 52,439    | 98.66 | 97.26 | 53.58 | 79.38      |
| Beef6     | 67,799 | 61,896   | 59,658    | 98.65 | 97.25 | 52.83 | 78.27      |
| Beef7     | 51,176 | 47,015   | 45,189    | 98.63 | 97.19 | 52.97 | 79.75      |
| Beef8     | 55,285 | 50,843   | 48,939    | 98.67 | 97.25 | 53.29 | 80.18      |
| Beef9     | 50,263 | 46,012   | 44,198    | 98.63 | 97.2  | 53.64 | 83.04      |
| Beef10    | 49,121 | 44,685   | 42,925    | 98.62 | 97.19 | 53.14 | 78.29      |
| Pork1     | 56,810 | 52,223   | 50,215    | 98.68 | 97.3  | 53.25 | 82.81      |
| Pork2     | 55,096 | 50,164   | 48,373    | 98.68 | 97.29 | 53.18 | 82.15      |

|        |        |        |        |       |       |       |       |
|--------|--------|--------|--------|-------|-------|-------|-------|
| Pork3  | 53,050 | 48,032 | 46,161 | 98.63 | 97.23 | 53.03 | 81.28 |
| Pork4  | 61,100 | 55,735 | 53,703 | 98.63 | 97.21 | 52.78 | 81.08 |
| Pork5  | 55,044 | 50,546 | 48,482 | 98.61 | 97.15 | 53.27 | 80.69 |
| Pork6  | 51,010 | 46,852 | 44,864 | 98.6  | 97.13 | 53.24 | 79.62 |
| Pork7  | 61,378 | 56,201 | 53,744 | 98.59 | 97.11 | 53.44 | 80.81 |
| Pork8  | 50,214 | 45,525 | 43,632 | 98.59 | 97.12 | 53.46 | 79.7  |
| Pork9  | 63,954 | 58,312 | 55,927 | 98.6  | 97.09 | 54.02 | 81.75 |
| Pork10 | 51,079 | 46,707 | 44,938 | 98.61 | 97.1  | 53.78 | 81.39 |

---

**Table S2.** ANOSIM of unweighted UniFrac distance against gut microbiota of mice fed laboratory chow, fish, pork or beef diet at OUT levels.

| Groups    | R-value | <i>P</i> -value |
|-----------|---------|-----------------|
| Fish-Beef | 0.5919  | 0.001           |
| Pork-Beef | 0.3186  | 0.002           |
| Pork-Fish | 0.3632  | 0.002           |
| Chow-Beef | 0.9913  | 0.001           |
| Chow-Fish | 0.9504  | 0.001           |
| Chow-Pork | 0.9224  | 0.001           |

**Table S3.** Blood metabolic indices of mice fed laboratory chow, fish, pork or beef.

| Blood indices | Chow                      | Fish                      | Pork                      | Beef                      | <i>P</i> -Value |
|---------------|---------------------------|---------------------------|---------------------------|---------------------------|-----------------|
| ALB (g/l)     | 11.66 ± 2.55              | 10.78 ± 2.19              | 11.00 ± 1.80              | 11.73 ± 2.20              | ns              |
| ALP (U/l)     | 154.72 ± 25.62            | 159.72 ± 28.97            | 186.34 ± 25.87            | 171.11 ± 26.70            | ns              |
| ALT (U/l)     | 397.54 ± 115.18           | 759.66 ± 503.68           | 303.82 ± 171.91           | 420.20 ± 465.35           | ns              |
| AST (U/l)     | 503.58 ± 147.39           | 764.94 ± 404.50           | 401.72 ± 184.90           | 460.29 ± 410.40           | ns              |
| BUN (mmol/l)  | 6.64 ± 3.47a              | 13.40 ± 3.90b             | 19.15 ± 2.76c             | 22.81 ± 4.03c             | ***             |
| GLU (mmol/l)  | 11.46 ± 1.33a             | 8.62 ± 0.89b              | 9.19 ± 1.50b              | 8.55 ± 1.48b              | **              |
| TP (g/l)      | 43.56 ± 5.47 <sup>a</sup> | 45.76 ± 8.97 <sup>a</sup> | 47.52 ± 8.24 <sup>a</sup> | 59.62 ± 7.00 <sup>b</sup> | **              |

ns: no significance, \**P* < 0.05, \*\**P* < 0.01, \*\*\**P* < 0.001.

## Supplementary Figures

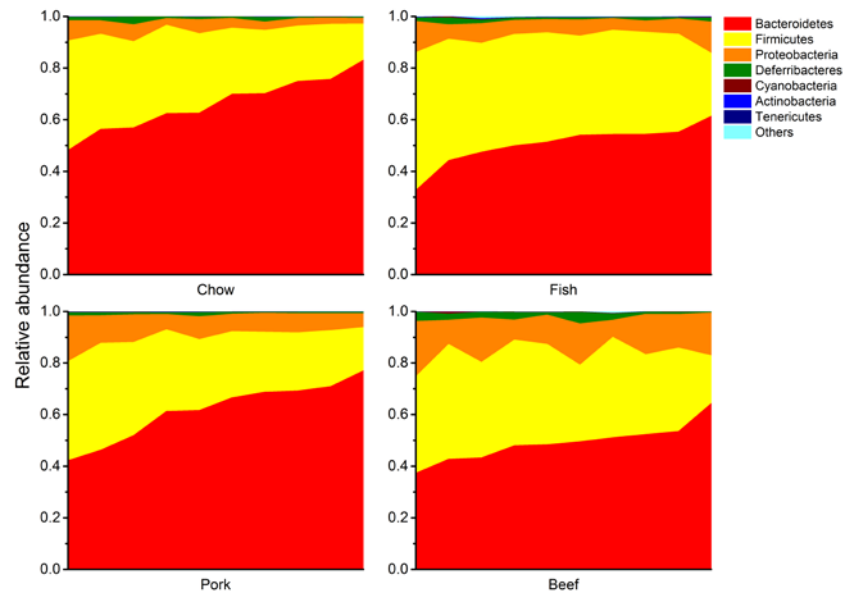

**Figure S1.** Individual heterogeneity in gut microbiota profiles within mice fed laboratory chow, fish, pork or beef.

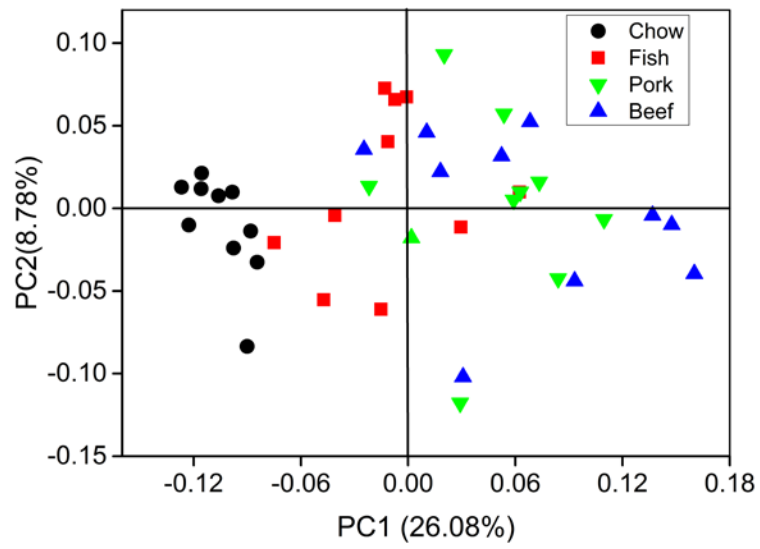

**Figure S2.** Principal coordinates analysis (PCoA) of gut microbiota based on unweighted UniFrac distance matrices. Mice were fed laboratory chow, fish, pork or beef.

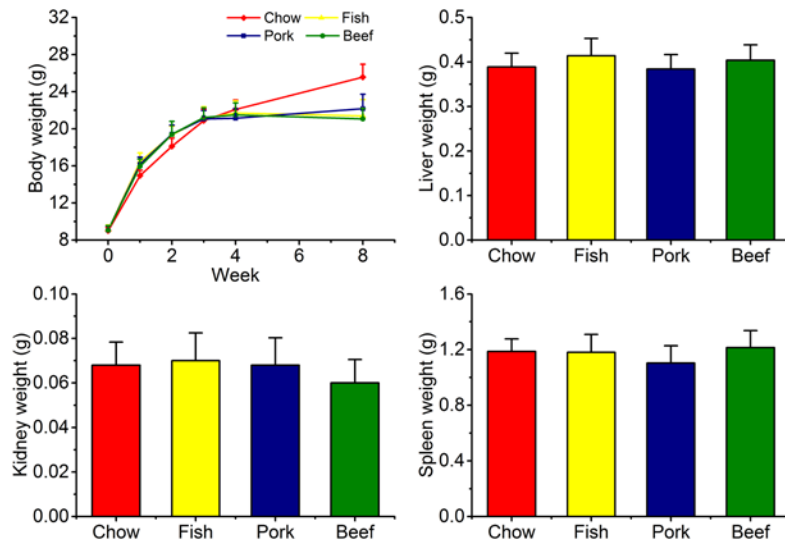

**Figure S3.** Body weight and internal organ weight of mice fed laboratory chow, fish, pork or beef.

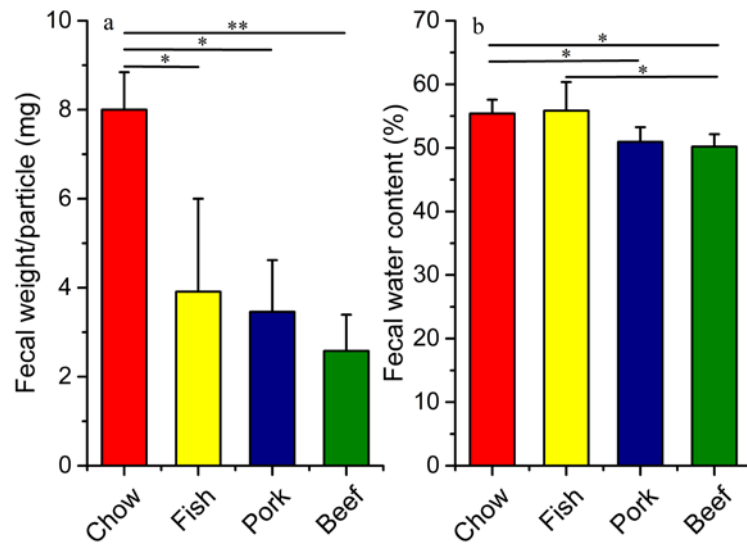

**Figure S4.** The fecal characteristics of mice fed laboratory chow, fish, pork or beef. (a) The fecal weight per particle; (b) The fecal water content. Data are presented as mean  $\pm$  SD (standard deviation). \* $P < 0.05$ , \*\* $P < 0.01$ , \*\*\* $P < 0.001$ .
